# Supplementary material
Source: publisher figshare collection journal article supplement (https://gsajournals.figshare.com/articles/dataset/_/15167376)
Supplement: Supplementary file 1 [file 1]

## Sheet: Suppl. Table 2
Suppl. Table 2. Genotypes of strains at locations where de novo mutations were detected. Variant types were called by snpEff 4.3K. A=homozygous reference genotype; B=heterozygous of de novo mutation and reference allele; C=homozygous for de novo mutation
Chromosome (H99)	Position	Variant type	Gene number	Gene name	CB-100-1	CB-100-2	CB-100-3	CB-100-5	CB-100-6	CC-100-1	CC-100-2	CC-100-3	CC-100-4	CC-100-5	CC-100-6	CN-100-1	CN-100-2	CN-100-3	CN-100-4	CN-100-5	CN-100-6	CW-100-1	CW-100-2	CW-100-3	CW-100-4	CW-100-5	CW-100-6	CY-100-1	CY-100-2	CY-100-3	CY-100-4	CY-100-5	CY-100-6	EM3	P1W10	P2W10	P3W10	P4W10	P5W10	P6W10	SSD719_vitro	SSD719_vivo	YSB121
1	338270	intron_variant	CNAG_00126	2-deoxy-D-gluconate 3-dehydrogenase	A	A	A	A	A	A	A	A	A	A	A	A	A	A	A	A	A	B	A	A	A	A	A	A	A	A	A	A	A	A	A	A	A	A	A	A	A	A	A
1	436851	missense_variant	CNAG_00160	hypothetical protein	A	A	A	A	A	A	A	A	A	A	A	A	A	A	A	A	B	A	A	A	B	A	A	A	A	A	A	A	A	A	A	A	A	A	A	A	A	A	A
1	518920	missense_variant	CNAG_00192	Predicted DNA helicase, DEAD-box superfamily	A	A	A	A	A	A	A	A	A	A	A	A	A	A	A	A	A	A	A	A	A	A	A	A	A	A	A	A	A	A	A	A	A	A	B	A	A	A	A
1	764173	splice_region_variant	CNAG_07347	Chaperone HSP104 and related ATP-dependent Clp proteases	A	A	A	A	A	A	A	A	A	A	A	A	A	A	A	A	A	A	A	A	A	A	A	A	A	A	A	A	A	A	A	A	B	A	A	A	A	A	A
1	1544423	missense_variant	CNAG_00600	capsular associated protein	B	A	A	A	A	A	A	A	A	A	A	A	A	A	A	A	A	A	A	A	A	A	A	A	A	A	A	A	A	A	A	A	A	A	A	A	A	A	A
1	1920879	splice_acceptor_variant	CNAG_00735	aldehyde dehydrogenase family 7 member A1	A	A	A	A	A	A	B	A	A	A	A	A	A	A	A	A	A	A	A	A	A	A	A	A	A	A	A	A	A	A	A	A	A	A	A	A	A	A	A
1	2226973	missense_variant	CNAG_00841	Fungal specific transcription factor domain	A	A	A	A	A	B	A	A	A	A	A	A	A	A	A	A	A	A	A	A	A	A	A	A	A	A	A	A	A	A	A	A	A	A	A	A	A	A	A
2	17530	intergenic	NA		A	A	A	A	C	A	A	A	C	A	A	A	A	A	A	A	A	A	A	C	A	A	A	A	A	A	A	A	A	A	A	A	A	A	A	A	A	A	A
2	65165	synonymous_variant	CNAG_06777	fructosyl amino acid oxidase	A	A	A	A	A	A	A	A	A	A	A	A	A	A	A	A	A	A	A	A	A	A	B	A	A	A	A	A	A	A	A	A	A	A	A	A	A	A	A
2	199060	intron_variant	CNAG_06732	Cytoplasm to vacuole targeting protein	A	A	A	A	A	A	A	A	A	A	A	A	A	A	A	A	A	A	A	A	A	A	A	A	B	A	A	A	A	A	A	A	A	A	A	A	A	A	A
2	308413	missense_variant	CNAG_07964	hypothetical protein	A	A	A	A	A	A	A	A	A	A	A	A	A	A	A	A	A	A	A	A	A	A	B	A	A	A	A	A	A	A	A	A	A	A	A	A	A	A	A
2	566148	missense_variant	CNAG_03699	pre-mRNA-processing ATP-dependent RNA helicase PRP5	B	A	A	A	A	A	A	A	A	A	A	A	A	A	A	A	A	A	A	A	A	A	A	A	A	A	A	A	A	A	A	A	A	A	A	A	A	A	A
2	998008	synonymous_variant	CNAG_03846	vacuolar membrane protein	A	A	A	A	A	A	A	A	A	A	A	A	A	A	A	A	A	A	A	A	A	A	A	A	A	A	A	A	A	A	A	A	A	B	A	A	A	A	A
2	1050452	missense_variant	CNAG_03870	delta8-fatty-acid desaturase	A	A	A	A	A	A	A	A	A	A	A	A	A	A	A	A	A	A	A	A	B	A	A	A	A	A	A	A	A	A	A	A	A	A	A	A	A	A	A
2	1108877	synonymous_variant	CNAG_03890	protein lysine methyltransferase SET5	A	A	A	A	A	A	B	A	A	A	A	A	A	A	A	A	A	A	A	A	A	A	A	A	A	A	A	A	A	A	A	A	A	A	A	A	A	A	A
2	1299280	5_prime_UTR_variant	CNAG_03968	polyadenylate-binding protein 2	A	A	A	A	A	A	A	A	A	A	A	A	A	A	A	A	A	A	B	A	A	A	A	A	A	A	A	A	A	A	A	A	A	A	A	A	A	A	A
2	1323512	intron_variant	CNAG_03979	ATP(GTP)-binding protein Fet5	A	A	A	A	A	B	A	A	A	A	A	A	A	A	A	A	A	A	A	A	A	A	A	A	A	A	A	A	A	A	A	A	A	A	A	A	A	A	A
2	1402814	missense_variant	CNAG_04014	26S proteasome regulatory subunit N9	A	A	A	A	A	A	A	A	A	A	A	A	A	B	A	A	A	A	A	A	A	A	A	A	A	A	A	A	A	A	A	A	A	A	A	A	A	A	A
2	1463676	missense_variant	CNAG_04036	Heat shock transcription factor	B	A	A	A	A	A	A	A	A	A	A	A	A	A	A	A	A	A	A	A	A	A	A	A	A	A	A	A	A	A	A	A	A	A	A	A	A	A	A
3	23871	intron_variant	CNAG_07499	Chitin synthase	A	A	A	A	A	A	A	A	A	A	A	A	A	A	A	A	A	A	A	A	A	A	A	A	A	A	A	B	A	A	A	A	A	A	A	A	A	A	A
3	77217	missense_variant	CNAG_03063	Cytosine deaminase FCY1 and related enzymes	A	A	A	A	A	A	A	A	A	A	A	A	A	A	A	A	A	A	A	A	A	A	A	B	A	A	A	A	A	A	A	A	A	A	A	A	A	A	A
3	87787	missense_variant	CNAG_03061	multiple drug resistance protein	A	A	A	A	A	A	A	A	A	A	A	A	A	B	A	A	A	A	A	A	A	A	A	A	A	A	A	A	A	A	A	A	A	A	A	A	A	A	A
3	242950	synonymous_variant	CNAG_02998	nuclear protein	A	A	A	A	A	A	B	A	A	A	A	A	A	A	A	A	A	A	A	A	A	A	A	A	A	A	A	A	A	A	A	A	A	A	A	A	A	A	A
3	415205	missense_variant	CNAG_02933	quinone oxidoreductase	A	A	A	A	A	A	A	A	A	A	A	A	A	A	A	A	A	A	A	A	A	A	A	A	A	A	A	B	A	A	A	A	A	A	A	A	A	A	A
3	659086	missense_variant	CNAG_02834	sterol 3-beta-glucosyltransferase	A	A	A	A	A	A	A	A	A	A	A	A	A	A	A	A	A	A	A	A	A	A	A	A	A	A	A	A	B	A	A	A	A	A	A	A	A	A	A
3	678984	synonymous_variant	CNAG_02825	Argininosuccinate lyase	A	A	A	A	A	A	A	A	A	A	A	A	A	B	A	A	A	A	A	A	A	A	A	A	A	A	A	A	A	A	A	A	A	A	A	A	A	A	A
3	800080	missense_variant	CNAG_02773	exosome complex exonuclease Rrp6	A	A	A	A	A	A	A	A	A	A	B	A	A	A	A	A	A	A	A	A	A	A	A	A	A	A	A	A	A	A	A	A	A	A	A	A	A	A	A
3	837933	missense_variant	CNAG_02755	hypothetical protein	A	A	A	A	A	A	A	A	A	A	A	A	A	A	A	B	A	A	A	A	A	B	A	A	A	A	A	A	A	A	A	A	A	A	A	A	A	A	A
3	984470	stop_gained	CNAG_02698	MADS box transcription factor	A	A	A	A	A	A	A	A	A	A	A	A	A	A	A	A	A	A	A	B	A	A	A	A	A	A	A	A	A	A	A	A	A	A	A	A	A	A	A
3	984471	missense_variant	CNAG_02698	MADS box transcription factor	A	A	A	A	A	A	A	A	A	A	A	A	A	A	A	A	A	A	A	B	A	A	A	A	A	A	A	A	A	A	A	A	A	A	A	A	A	A	A
3	1365423	missense_variant	CNAG_02562	acyl-CoA dehydrogenase	A	A	A	A	A	A	A	A	A	A	A	B	A	A	A	A	A	A	A	A	A	A	A	A	A	A	A	A	A	A	A	A	A	A	A	A	A	A	A
4	139809	synonymous_variant	CNAG_04981	Catalase 1	A	A	A	A	A	A	A	A	A	A	A	A	A	A	A	A	A	A	A	A	A	A	A	B	A	A	A	A	A	A	A	A	A	A	A	A	A	A	A
4	425167	missense_variant	CNAG_05096	histone deacetylase 1/2, histone deacetylase 1/2, variant 1, histone deacetylase 1/2, variant 2	A	A	A	A	A	A	A	A	A	A	A	A	A	B	A	A	A	A	A	A	A	A	A	A	A	A	A	A	A	A	A	A	A	A	A	A	A	A	A
4	585585	stop_gained	CNAG_05157	hypothetical protein	A	A	A	A	A	B	A	A	A	A	A	A	A	A	A	A	A	A	A	A	A	A	A	A	A	A	A	A	A	A	A	A	A	A	A	A	A	A	A
5	32929	5_prime_UTR_variant	CNAG_06867	hypothetical protein	A	A	A	A	A	A	A	A	A	A	A	A	A	B	A	A	A	A	A	A	A	A	A	A	A	A	A	A	A	A	A	A	A	A	A	A	A	A	A
5	141490	missense_variant	CNAG_06828	solute carrier family 36 (proton-coupled amino acid transporter)	A	A	A	B	A	A	A	A	A	A	A	A	A	A	A	A	A	A	A	A	A	A	A	A	A	A	A	A	A	A	A	A	A	A	A	A	A	A	A
5	358288	missense_variant	CNAG_01419	Coeffector of mDia Rho GTPase, regulates actin polymerization and cell adhesion turnover	A	A	A	A	A	A	A	A	A	A	A	A	A	A	A	A	A	B	A	A	A	A	A	A	A	A	A	A	A	A	A	A	A	A	A	A	A	A	A
5	509873	missense_variant	CNAG_01357	Dual specificity phosphatase	A	A	A	A	A	A	A	A	A	B	A	A	A	A	A	A	A	A	A	A	A	A	A	A	A	A	A	A	A	A	A	A	A	A	A	A	A	A	A
5	539242	synonymous_variant	CNAG_01346	Phosphoglycerate mutase	A	A	A	A	A	A	A	A	A	A	A	A	A	A	A	B	A	A	A	A	A	B	A	A	A	A	A	A	A	A	A	A	A	A	A	A	A	A	A
5	604791	missense_variant	CNAG_01319	Microtubule effector PAC2, putative	A	A	A	A	A	A	A	A	B	A	A	A	A	A	A	A	A	A	A	A	A	A	A	A	A	A	A	A	A	A	A	A	A	A	A	A	A	A	A
5	741560	missense_variant	CNAG_07429	asparagine-tRNA ligase	A	A	A	A	A	A	A	A	A	A	A	A	A	A	A	A	A	A	A	A	A	A	A	B	A	A	A	A	A	A	A	A	A	A	A	A	A	A	A
5	1076765	intron_variant	CNAG_01149	obsolete electron transport	A	A	A	A	B	A	A	A	A	A	A	A	A	A	A	A	A	A	A	A	A	A	A	A	A	A	A	A	A	A	A	A	A	A	A	A	A	A	A
5	1127789	missense_variant	CNAG_01129	lanosterol synthase	A	A	A	A	A	A	A	A	A	A	A	A	A	A	A	A	A	A	A	A	A	A	A	A	A	A	A	A	A	A	A	A	B	A	A	A	A	A	A
5	1322628	synonymous_variant	CNAG_07444	hypothetical protein	A	A	A	A	A	A	A	A	A	A	B	A	A	A	A	A	A	A	A	A	A	A	B	A	A	A	A	A	A	A	A	A	A	A	A	A	A	A	A
5	1455572	intergenic	NA		A	A	A	B	A	A	A	A	A	A	A	A	A	A	A	A	A	A	A	A	A	A	A	A	A	A	A	A	A	A	A	A	A	A	A	A	A	A	A
5	1619814	stop_gained	CNAG_00923	Calcium-dependent channel, 7TM region, putative phosphate	A	A	A	A	A	A	A	A	A	A	A	A	A	A	A	A	A	B	A	A	A	A	A	A	A	A	A	A	A	A	A	A	A	A	A	A	A	A	A
6	85450	missense_variant	CNAG_02526	hypothetical protein	A	A	A	A	A	A	A	B	A	A	A	A	A	A	A	A	A	A	A	A	A	A	A	A	A	A	A	A	A	A	A	A	A	A	A	A	A	A	A
6	96501	missense_variant	CNAG_02523	Large RNA-binding protein (RRM superfamily)	A	A	A	A	A	A	A	A	A	A	A	A	A	A	A	A	A	A	A	A	A	A	A	A	A	A	B	A	A	A	A	A	A	A	A	A	A	A	A
6	580135	synonymous_variant	CNAG_02335	Protein of unknown function DUF89	A	A	A	A	A	A	A	A	A	A	A	A	A	B	A	A	A	A	A	A	A	A	A	A	A	A	A	A	A	A	A	A	A	A	A	A	A	A	A
6	686428	intron_variant	CNAG_02291	DASH complex subunit DAM1	A	A	A	B	A	A	A	A	A	A	A	A	A	A	A	A	A	A	A	A	A	A	A	A	A	A	A	A	A	A	A	A	A	A	A	A	A	A	A
6	1293498	synonymous_variant	CNAG_02064	TATA-box-binding protein-associated factor	A	A	A	A	A	A	B	A	A	A	A	A	A	A	A	A	A	A	A	A	A	A	A	A	A	A	A	A	A	A	A	A	A	A	A	A	A	A	A
6	1413889	missense_variant	CNAG_02020	SWR1-complex protein 4	A	A	A	A	A	A	A	A	A	B	A	A	A	A	A	A	A	A	A	A	A	A	A	A	A	A	A	A	A	A	A	A	A	A	A	A	A	A	A
7	56752	synonymous_variant	CNAG_06540	Dihydroxy-acid dehydratase, dihydroxy-acid dehydratase, variant	A	A	A	A	A	A	A	A	A	A	A	A	A	A	A	A	A	A	A	A	A	A	A	A	A	A	B	A	A	A	A	A	A	A	A	A	A	A	A
7	80191	stop_gained	CNAG_06548	ER membrane protein complex subunit 1, C-terminal	A	A	A	A	A	A	A	A	A	A	A	A	A	A	A	A	A	A	A	A	A	A	B	A	A	A	A	A	A	A	A	A	A	A	A	A	A	A	A
7	215787	missense_variant	CNAG_06591	histone deacetylase complex subunit, putative	A	B	A	A	A	A	A	A	A	A	A	A	A	A	A	A	A	A	A	A	A	A	A	A	A	A	A	A	A	A	A	A	A	A	A	A	A	A	A
7	256753	synonymous_variant	CNAG_06607	DNA polymerase alpha subunit A	A	A	A	A	A	A	A	A	A	A	A	A	A	A	A	B	A	A	A	A	A	B	A	A	A	A	A	A	A	A	A	A	A	A	A	A	A	A	A
7	274151	missense_variant	CNAG_06611	DNA-directed RNA polymerase I subunit RPA2	A	A	A	A	A	A	A	A	A	A	A	A	A	A	A	A	A	A	A	A	A	A	A	A	B	A	A	A	A	A	A	A	A	A	A	A	A	A	A
7	438963	intron_variant	CNAG_06672	Glyoxylate/hydroxypyruvate reductase (D-isomer-specific 2-hydroxy acid dehydrogenase superfamily)	A	A	A	A	A	A	A	A	A	B	A	A	A	A	A	A	A	A	A	A	A	A	A	A	A	A	A	A	A	A	A	A	A	A	A	A	A	A	A
7	739463	synonymous_variant	CNAG_05739	Ca2+-binding protein Regucalcin/SMP30	A	A	A	A	A	A	A	A	A	A	A	A	A	A	A	A	A	A	A	A	A	A	A	A	A	A	A	B	A	A	A	A	A	A	A	A	A	A	A
7	791703	missense_variant	CNAG_05759	acetyl-CoA carboxylase/biotin carboxylase	A	A	A	A	A	A	A	A	A	A	A	A	A	A	A	B	A	A	A	A	A	B	A	A	A	A	A	A	A	A	A	A	A	A	A	A	A	A	A
7	1170860	missense_variant	CNAG_05903	hypothetical protein	A	A	A	A	A	A	A	A	A	A	A	A	A	A	A	A	A	A	A	A	A	A	A	B	A	A	A	A	A	A	A	A	A	A	A	A	A	A	A
8	71546	missense_variant	CNAG_03109	ubiquitin carboxyl-terminal hydrolase 14	A	A	A	A	A	A	A	A	B	A	A	A	A	A	A	A	A	A	A	A	A	A	A	A	A	A	A	A	A	A	A	A	A	A	A	A	A	A	A
8	512565	missense_variant	CNAG_03261	Zn finger protein	A	A	A	A	A	A	A	A	A	A	A	A	A	A	A	A	B	A	A	A	B	A	A	A	A	A	A	A	A	A	A	A	A	A	A	A	A	A	A
8	623027	missense_variant	CNAG_03311	hydroxymethylglutaryl-CoA synthase	A	A	A	A	A	A	A	A	A	A	A	B	A	A	A	A	A	A	A	A	A	A	A	A	A	A	A	A	A	A	A	A	A	A	A	A	A	A	A
8	846059	missense_variant	CNAG_03397	beta-1,6-N-acetylglucosaminyltransferase, contains WSC domain	A	A	A	A	A	A	A	A	A	A	A	A	A	A	A	A	A	A	A	A	A	A	A	A	A	A	A	A	A	A	A	A	B	A	A	A	A	A	A
8	1213149	missense_variant	CNAG_03534	hypothetical protein	A	A	A	A	A	A	A	A	A	A	A	A	A	A	A	A	A	B	A	A	A	A	A	A	A	A	A	A	A	A	A	A	A	A	A	A	A	A	A
9	147944	synonymous_variant	CNAG_04152	protein phosphatase methylesterase 1	A	A	A	A	A	A	A	A	A	A	A	A	A	A	A	A	A	A	A	A	A	A	A	A	A	B	A	A	A	A	A	A	A	A	A	A	A	A	A
9	167723	missense_variant	CNAG_04162	AGC/PKA protein kinase	A	A	A	A	B	B	A	A	A	A	A	A	A	A	A	A	A	A	A	A	A	A	A	A	A	A	A	A	A	A	A	A	A	A	A	A	A	A	A
9	494873	synonymous_variant	CNAG_04291	glycosyl-hydrolase	A	A	A	C	B	A	A	A	A	A	A	A	A	B	A	A	B	A	A	A	A	A	A	A	B	B	A	A	B	A	A	A	B	A	A	A	A	A	A
9	567916	missense_variant	CNAG_04324	ATP binding	A	A	A	A	A	A	A	A	A	B	A	A	A	A	A	A	A	A	A	A	A	A	A	A	A	A	A	A	A	A	A	A	A	A	A	A	A	A	A
10	2230	missense_variant	CNAG_04931	Putative hexose transporter	A	A	A	A	A	A	A	A	A	A	A	A	A	B	A	A	A	A	A	A	A	A	A	A	A	A	A	A	A	A	A	A	A	A	A	A	A	A	A
10	136140	missense_variant	CNAG_04876	endo-1,3(4)-beta-glucanase	A	A	A	A	A	A	A	A	A	A	A	A	A	A	A	A	A	A	B	A	A	A	A	A	A	A	A	A	A	A	A	A	A	A	A	A	A	A	A
11	169697	missense_variant	CNAG_01519	Endonuclease/Exonuclease/phosphatase family	A	A	A	A	B	A	A	A	A	A	A	A	A	A	A	A	A	A	A	A	A	A	A	A	A	A	A	A	A	A	A	A	A	A	A	A	A	A	A
11	321845	missense_variant	CNAG_01573	Putative growth response protein	A	A	A	A	A	A	A	A	A	A	A	A	A	A	A	A	A	B	A	A	A	A	A	A	A	A	A	A	A	A	A	A	A	A	A	A	A	A	A
11	596833	intron_variant	CNAG_01682	mitochondrial outer membrane 72K protein	A	A	A	A	A	A	A	A	A	A	A	A	A	A	A	A	A	A	A	A	A	A	A	A	A	A	A	A	A	A	A	A	B	A	A	A	A	A	A
11	668316	synonymous_variant	CNAG_01707	Putative regulator of G-protein signaling protein	A	A	A	A	A	A	A	A	A	A	A	A	A	A	A	B	A	A	A	A	A	B	A	A	A	A	A	A	A	A	A	A	A	A	A	A	A	A	A
11	681999	synonymous_variant	CNAG_01711	glycerol-3-phosphate O- acyltransferase/dihydroxyacetone phosphate acyltransferase	A	A	A	A	B	A	A	A	A	A	A	A	A	A	A	A	A	A	A	A	A	A	A	A	A	A	A	A	A	A	A	A	A	A	A	A	A	A	A
11	750801	missense_variant	CNAG_01734	pre-mRNA-splicing factor ATP-dependent RNA helicase DHX16	A	A	A	A	A	A	A	A	A	A	A	A	A	B	A	A	A	A	A	A	A	A	A	A	A	A	A	A	A	A	A	A	A	A	A	A	A	A	A
11	1001656	synonymous_variant	CNAG_01820	Pyruvate kinase, pyruvate kinase, variant	A	A	A	A	B	A	A	A	A	A	A	A	A	A	A	A	A	A	A	A	A	A	A	A	A	A	A	A	A	A	A	A	A	A	A	A	A	A	A
11	1289441	missense_variant	CNAG_01928	Xaa-Pro aminopeptidase	A	A	A	A	A	A	A	A	A	A	A	A	A	A	A	A	A	A	A	A	A	A	A	A	A	A	A	A	A	A	A	A	B	A	A	A	A	A	A
11	1329168	synonymous_variant	CNAG_01941	glucan synthesis regulatory protein	A	A	A	A	A	A	A	A	A	A	A	A	A	A	B	A	A	A	A	A	A	A	A	A	A	A	A	A	A	A	A	A	A	A	A	A	A	A	A
12	657294	missense_variant	CNAG_06218	Amidase	A	A	A	A	A	A	B	A	A	A	A	A	A	A	A	A	A	A	A	A	A	A	A	A	A	A	A	A	A	A	A	A	A	A	A	A	A	A	A
12	705464	intergenic	NA		A	A	A	A	B	A	B	A	B	A	B	A	A	B	A	A	A	A	A	B	A	A	A	A	A	A	A	A	A	A	A	A	A	A	B	A	A	A	A
12	755179	synonymous_variant	CNAG_07917	uracil transporter FurD	B	A	A	A	A	A	A	A	A	A	A	A	A	A	A	A	A	A	A	A	A	A	A	A	A	A	A	A	A	A	A	A	A	A	A	A	A	A	A
13	157897	missense_variant	CNAG_06311	SNARE associated Golgi protein	A	A	A	A	A	A	A	A	A	A	A	A	A	A	A	A	A	A	B	A	A	A	A	A	A	A	A	A	A	A	A	A	A	A	A	A	A	A	A
13	307803	intergenic	NA		A	A	A	A	A	A	A	B	A	A	A	A	A	A	A	A	A	A	A	A	A	A	A	A	A	A	A	A	A	A	A	A	A	A	A	A	A	A	A
13	390509	stop_gained	CNAG_06400	plasma-membrane proton-efflux P-type ATPase	A	A	A	A	A	A	A	B	A	A	A	A	A	A	A	A	A	A	A	A	A	A	A	A	A	A	A	A	A	A	A	A	A	A	A	A	A	A	A
13	550414	missense_variant	CNAG_06465	Lipid flippase subunit CDC50	A	A	A	A	A	A	A	A	B	A	A	A	A	A	A	A	A	A	A	A	A	A	A	A	A	A	A	A	A	A	A	A	A	A	A	A	A	A	A
14	126567	missense_variant	CNAG_05374	chromosome transmission fidelity protein 18	A	A	A	A	A	A	A	A	A	A	A	A	A	A	A	A	A	A	A	A	A	A	A	A	A	A	A	A	A	A	A	A	A	A	B	A	A	A	A
14	274597	intergenic	NA		A	A	A	A	A	A	A	A	A	A	A	A	A	A	A	A	A	B	A	A	A	A	A	A	A	A	A	A	A	A	A	A	A	A	A	A	A	A	A
14	596560	missense_variant	CNAG_05539	Predicted membrane protein	A	A	A	A	A	A	A	A	A	A	A	A	A	A	A	A	A	A	A	A	A	A	A	A	B	A	A	A	A	A	A	A	A	A	A	A	A	A	A
14	622571	synonymous_variant	CNAG_05551	Uncharacterized conserved protein	A	A	A	A	A	A	A	A	A	A	A	A	A	A	A	A	A	A	A	A	A	A	A	A	A	A	A	A	A	A	A	B	A	A	A	A	A	A	A
14	861045	synonymous_variant	CNAG_05643	DNA polymerase delta subunit 4	A	A	A	A	A	A	B	A	A	A	A	A	A	A	A	A	A	A	A	A	A	A	A	A	A	A	A	A	A	A	A	A	A	A	A	A	A	A	A
