# Supplementary material
Source: publisher figshare collection journal article supplement (https://gsajournals.figshare.com/articles/dataset/_/15167376)
Supplement: Supplementary file 1 [file 1]

**Suppl. Table 3.** Heterozygosity across chromosomes is not correlated with frequency of crossover events or nondisjunction (NDJ). Data are relative to *C. neoformans* H99 genome. Only one breakpoint for each gene conversion is considered.

| Chr | Size    | Num SNPs | SNP rate | Num. breaks | NDJ |
|-----|---------|----------|----------|-------------|-----|
| 1   | 2291499 | 72959    | 0.0318   | 1           | 1   |
| 2   | 1621675 | 39814    | 0.0246   | 1           | 29  |
| 3   | 1575141 | 50117    | 0.0318   | 5           | 6   |
| 4   | 1084805 | 30247    | 0.0279   | 2           | 0   |
| 5   | 1814975 | 54199    | 0.0299   | 6           | 0   |
| 6   | 1422463 | 45598    | 0.0321   | 3           | 0   |
| 7   | 1399503 | 42668    | 0.0305   | 7           | 0   |
| 8   | 1398693 | 42582    | 0.0304   | 1           | 0   |
| 9   | 1186808 | 37586    | 0.0317   | 1           | 12  |
| 10  | 1059964 | 29439    | 0.0278   | 5           | 1   |
| 11  | 1561994 | 47038    | 0.0301   | 4           | 0   |
| 12  | 774062  | 20441    | 0.0264   | 4           | 3   |
| 13  | 756744  | 20401    | 0.0270   | 3           | 1   |
| 14  | 926563  | 27207    | 0.0294   | 4           | 0   |
