# Supplementary material
Source: publisher figshare collection journal article supplement (https://gsajournals.figshare.com/articles/dataset/_/15167376)
Supplement: Supplementary file 2 [file 1]

**Suppl. Table 1.** Markers used for screening mating products for heterozygosity. Chromosome numbers and positions are relative to the H99 genome.

| <b>Marker</b>      | <b>Chromosome</b> | <b>Position</b> | <b>Forward Primer (5' - 3')</b> | <b>Reverse Primer (5' - 3')</b> |
|--------------------|-------------------|-----------------|---------------------------------|---------------------------------|
| Chrom01_Region5    | 1                 | 128800-131200   | GCACATGAAGAAATATGACCG           | GCACATTCGCCAATCCTATC            |
| Chrom01_Region8    | 1                 | 389600-391200   | AATGAGACGAATACGGTCGG            | AGCTCTCTTTCACTGACACGA           |
| Chrom02_Region1    | 2                 | 88000-89600     | GCACAGGCCAGTAAAGGAGG            | GAATCTGAGAAGGCTGAGGCTA          |
| Chrom02_Region5    | 2                 | 1228800-1231200 | GCTGCTGCATTTGCTGAG              | TGAAATGAACGAACTAGTACGG          |
| Chrom07_Region1    | 7                 | 56800-59200     | CGCCCTCTTGCTGAAGTTG             | TTTCTCTTGTGCTTCAAATGC           |
| Chrom07_Region5    | 7                 | 512800-514400   | GAAATGGTGCGAGAATAGGC            | CATCTGCACTTCGAACGAC             |
| Chrom10_Region7    | 10                | 967200-968000   | ATTTTCAGGTATCCCCATGC            | CATTGGTAAACTCGCCTCTG            |
| Chrom12_Region1    | 12                | 87200-88800     | GGAACGAGATGGAAATCGG             | GTCTCACTGCCAGTAAAGTCAG          |
| Chrom12_Region8    | 12                | 721600-724000   | GCCATTTGGACTTTGGGTG             | TGACTCTTGTGGAGCTTAACG           |
| Chrom13_Region1    | 13                | 108000-108800   | CGCCTTTGATTGCTGATGAC            | GGGATAGCTCTTGGCAATGC            |
| Chrom13_Region4    | 13                | 693600-695200   | GAAGCCATCTTGCTGAAGTG            | TTCGGGAGGGTGACTCTC              |
| STE20_neo_MATalpha | 5                 | 247512-247841   | GGCTGCAATCACAGCACCTTAC          | CTTCATGACATCACTCCCCTAT          |
| STE20_deneo_MATa   | 5                 | n.a.            | CACATCTCAGATGCCATTTTACCA        | AGCTCTAAGTCATATGGGTTATAT        |
